# Supplementary material
Source: MDPI journal article supplement (https://www.mdpi.com/search?q=ijms-15-02305)
Supplement: s001 [file ijms-15-02305-s001.pdf]

## Supplementary Information

**Table S1.** Annotation of proteins that are involved in ER *N*-glycosylation pathways.

| <b>Abbreviation</b> | <b>Definition</b>                                                                                     |
|---------------------|-------------------------------------------------------------------------------------------------------|
| DK                  | Dolichol kinase                                                                                       |
| ALG7                | UDP- <i>N</i> -acetylglucosamine--dolichyl-phosphate<br><i>N</i> -acetylglucosaminephosphotransferase |
| ALG13               | UDP-GlcNAc:dolichyl-pyrophosphoryl-GlcNAc GlcNAc transferase                                          |
| ALG14               | UDP-GlcNAc:dolichyl-pyrophosphoryl-GlcNAc GlcNAc transferase                                          |
| ALG1                | chitobiosyldiphosphodolichol beta-mannosyltransferase                                                 |
| ALG2                | glycolipid 3-alpha-mannosyltransferase                                                                |
| ALG11               | GDP-mannose:glycolipid 1,2-alpha-D-mannosyltransferase                                                |
| ALG3                | dolichol phosphomannose-oligosaccharide-lipid mannosyltransferase                                     |
| ALG9                | dolichol phosphomannose-oligosaccharide-lipid mannosyltransferase                                     |
| ALG12               | Alpha-1,6-mannosyltransferase                                                                         |
| ALG6                | Alpha-1,3-glucosyltransferase                                                                         |
| ALG8                | Alpha-1,3-glucosyltransferase                                                                         |
| ALG10               | Alpha-1,2 glucosyltransferase                                                                         |
| ALG5                | Dolichyl-phosphate beta-glucosyltransferase                                                           |
| DPM1                | Dolichol-phosphate mannosyltransferase                                                                |
| STT3                |                                                                                                       |
| OST1                |                                                                                                       |
| OST2                |                                                                                                       |
| OST3/6              | Dolichyldiphosphoryloligosaccharide-protein                                                           |
| OST4                |                                                                                                       |
| OST5                |                                                                                                       |
| WBP1                |                                                                                                       |
| SWP1                |                                                                                                       |
| RFT1                | Flippase                                                                                              |
| GCS1                | Mannosyl-oligosaccharide glucosidase I                                                                |
| GANAB               | Alpha 1,3-glucosidase II                                                                              |
| GANABb              | Alpha 1,3-glucosidase II ,beta subunit                                                                |
| MAN1                | Mannosyl-oligosaccharide alpha-1,2-mannosidase                                                        |
| UGGT                | UDP-glucose:glycoprotein glucosyltransferase                                                          |
| CALNEX              | Calnexin                                                                                              |
| CALRET              | Calreticulin                                                                                          |

**Table S2.** Predicted protein encoded-genes involved in the red microalga *Porphyridium* sp. ER N-glycosylation pathway.

| Enzyme | <i>Porphyridium</i> sequence                                                                                                                                                                                                                                                                                                                                                                                                                                                                                                                                                                                                                                   |
|--------|----------------------------------------------------------------------------------------------------------------------------------------------------------------------------------------------------------------------------------------------------------------------------------------------------------------------------------------------------------------------------------------------------------------------------------------------------------------------------------------------------------------------------------------------------------------------------------------------------------------------------------------------------------------|
| DK     | GGAAGAAAVLFLLEVRCASMPKVSPSLNVFMRALTDERDSGVLITTHMLLLVGCAGPLWVEDRISLHA<br>QSFASRSRALSGVIAVGVLDLSTASFIGVHFGRTTPWSAGTPKSVEGSSAGFVGAVACFYAIHCFTSSSPFAPI<br>PAPLSTRIPLMSSDIRSAAAVALASALAAVFEAHTTQIDNLVPLYLHAALSLLL                                                                                                                                                                                                                                                                                                                                                                                                                                                   |
| ALG7   | MGAGWMYAGMLLVPAVGVLLRACIEAGDVYMGVVARALLLAVAGMVL TARMVPAAQALMEKAQ<br>MFGYDINKKGTTPQGA VKVPEALGIVPATIFIVILCLLHSHALRAAHAPAWVHSFLPLDAGRSSLLPHDDSN<br>LSSVVLYTSALASVTFMTLLGFADDVLDLRWRYKMVLPFGCMPLLANYSGSTSIVIPVPLRSLDFDKTLL<br>DIGLLYFIYMALLSIFCTNAINIYAGINGLEAGQSFVIGCFILIHNAMQLNPHRHVEDLALLRSNNMFSVEI<br>MLPFVMVTLGLLRHNWFPSRVFVGDTFCYFAGMTLAMGAILGHYAEILLFFIPQLINFVYSLPQLIGIVP<br>CPRHRLPKYNVETKKLEPIKSHLNLVNL TLLCTGPLTEKRLCEVLMFLFQVACCSAGLAMRYLVIKYYLL                                                                                                                                                                                                       |
| ALG13  | MGASGERSVFTVVGSTEFDALIEAMTAPQMLRALRALGYTKLRVQYGRGKVFPRACGEDDGLFDEMVD<br>CFRFKPSLTHDMQRAGLIISHAGAGSIFEALRMGKNLIVVINDRLMDNHQAEAEEMQALGHSYAATCSN<br>LLDVIQSSVRSRCWRPFSVRSLSGSPDTRLALLMVSHNVDKS                                                                                                                                                                                                                                                                                                                                                                                                                                                                    |
| ALG14  | MSGQESDVGHVSAALAAAVFLSVLTSCLLASNNIRRRRKL VARTSSAEANMPPELSLDPLPHACGNG<br>AGHKPTIMFVLGSGGHTAEMLHFVRDWFRCMPTFDENQRGIA YKFV FV VASTDNHSEQKVLELFKDA<br>RGASHVEYEVAKIPRAREVRQSWVTSVFTTFIALLSSVIVYLKHRPDVLCNPGTCVPMACALFGRAV<br>AVATTSVIYVESVARVRHLSLS<br>GKLLYWL VDRFIVQWPHLQQTHPLSEYHGRLT                                                                                                                                                                                                                                                                                                                                                                           |
| ALG1   | MEWTITVFLWTCVALLCVHVAWGLDEIARLTWACLWASRVGGPKIQEDLTRDVHVAVLVNGDIGQSP<br>RTLHHAEMLAKWSFRPSVSPSQFGAESDADLDEAGATVLSKGYEYEGGAISQQGAVPRSSSTRVTVFAYGD<br>PPKSLVQTEPGMHPQFPTQGQTSPQVTFRKHARTRVRRDHGSAVYFITSVLATVSRALDLIEALWTCRP<br>RLDALIMQNPPSIPSLLIALVF<br>ARLRHGALVVVDWHNFGYTILRTTRAPSLLLVLAEWYESTLAPY ADAHL CVSTAMCEFLRDEWNVDAT<br>VYYDMPHCVFRPVSVEEHD LFLRLEQEYSLPIATERGSYPVSCTLR TSCGERNQHTTRRSRDPFLCVSST<br>SWTPDEDFELLFDALVELDKSLLQMSYSNTRTGETQVSNLERSLVSPQLLFVITGRGPLRAAFEARIARA<br>DLRCILVVCAWLSKQDYAHL LGSADVG VCLHSSSSGLDLP MKA VDMLGAGLPVIAVDYGCITELIVPGK<br>SGLLVRGADELASTILDMDGFPGKKGKRIGSEKGFGLSQVMREWIRAKYGLSDQRADSEWCRV VAPKLN<br>TLLDLREDLPDPPSKFSL |
| ALG2   | MVDEKEGRRVAIVHPDLGLGGAERLVVDAALGLQERGHKVIYTAHRDVQRCFPEVRPHLGGSVSCT<br>LVNTYVPRSVLGRFHALCTVIQC VILALYVCVNASRVDVAFCDIVSAPALIFRMFGIPCIFYCHFPDQMLA<br>DSIRVSHAKLAEVDSSFVAVIKRFGR LVYRAFVDRLERFAISRATCVAVNSQFTARMFSEVYPDLLRGHE<br>RKEPIVYPAVNIRPSVGHDA SLTSRLWATFAEEMFPV KDPILLVSLNRF EK KKNVALAVRALHAIRSSD<br>SLVPNKQLRDSIVLLIAGGDDDRLEENKQTLHNVRQLISELRLEAFVGVELNFDESKRISILRAARALYTP<br>SSEHFGIVPLEAMAAGVPVIAVDSGGPRETVQDQATGFLCPAEPAAFAQAAARLVVDQKLA EELGKRGR<br>ERAQSLFSVDALGTALEGLVHECCDAKLARTATKPSRKKQS                                                                                                                                                       |
| ALG11  | MVLRYSYSSRVGQCRGRLDGTHEQECGDVFDVWVRPGGMEWTERVRAGVHVVLGLFVLYVSVLLGF<br>GLLVLRAMRARQRDRDLRTRPSKDDASCAASGNAARDAKDAFVVSFLHPHALAGGGGERVLWLA<br>IKALRGRFPDATDLKIRVFTKGAPRKADVLEKVFVQFGIDIFTTQFELRELWSESLLDGARYPFCTLLLQFL<br>AGAIAGVECTLLHVATDLFIDTTGHAASLAVAKWLGCHVATYVHYPTISTDMHVVRSRSTSQFNNSSR<br>IADSLFLSGAKLAYR LFSHMYGLAGGCADVMVNSSWTRSHISSLWSGSRRKISLVFPPIIDTKPLLAFG<br>MDKRDPALIVSVAQFRPEKNHALQIEAFVKLLHKQSRDPRSDTLRPRVMIGGCRNADDAARVELLYEIEI<br>QNTYHLRVPDQVELLVNVT RDQLHAYLAKASAAIHTMKDEHFGISVVEFQAAGVIAVAHNSGGVALDII<br>QNGKYGFLAETADQFADCLSSALSLSNSSLAMIQTARDAASRYSD EGFATEVLKALQRVLPVD                                                                   |

**Table S2. Cont.**

| Enzyme | <i>Porphyridium</i> sequence                                                                                                                                                                                                                                                                                                                                                                                                                                                                                                                                                                                                                                                          |
|--------|---------------------------------------------------------------------------------------------------------------------------------------------------------------------------------------------------------------------------------------------------------------------------------------------------------------------------------------------------------------------------------------------------------------------------------------------------------------------------------------------------------------------------------------------------------------------------------------------------------------------------------------------------------------------------------------|
| ALG3   | MARGTDGSLACDGLTRRQAMGVTAEHVGARIMCSKENERGRTQGGGFACASWTRMIGEVLDRDLDRY<br>TKRRDGMILSAFVLLFVAVSGSFVIVQVPYTEIDWVAYMQEVAGVLEGERDYIKLRGDTGPLVYPAGF<br>VYIYSFLFYVTDAGVNVQLAQWIFLAVLLCTVAVVLGIYRVAITSQPGLMPPLVVMLLVASRRVMSLHV<br>LRLFNDCEVALLAYASILLFAHNKWAFCVLYSLAVSVKMNALLYAPALLMLLLQANGVARTIGYLSIC<br>AVVQIVLGLPFLISHPVQYLTKAFELSRVFEHRWSVNYAFLSIPTFTSKGLALVLLLGHLLATLAWFGSREV<br>WGRKVHPVRSTGRAAADADYVLRVLFTCNLIGIAFARTLHYQFYAWYFHTLPYLLWRGRLPFALKLA<br>VLLGIEMAYNIYPPRAWSSIVLHVCHAITIAALSATSSVSKSETNKHNH                                                                                                                                                                                  |
| ALG9   | MRRRRSGPGRGGSSSGRERETRDGVVDRKPGGTAGSQRRMRTALSAIFSRHRAVPGWAPNVVTAFLF<br>LLFLRLGSAMVSGIEDCDEFNYWEPLHYLVFGYGFQTWEYSPQFALRSYVFLLPYSVVAKIGSMVSLGS<br>KGPAEIKYNAFLAVRFAQAFACAAAETLYDSVIWRFGKPAAXXLLLALLMAAPGLFRASVELLPSSFA<br>MIGVCAATAAWLVGEFQLAVLGIAVAAVMGWPFAAVLGLPMSFHITYRKGILQFMQWMFSDGLVLAFT<br>CFIVDTRFYGRFTLAPANLVIYNVLPAQGAGPTAFGVEDWKYYVFNMLNLNVSALLLVLYPLLWIWDG<br>LVADAWPTRQDALTRLIFLSPAFIWL FVMFNQPHKEERFLAPVYPLVALVSAVSLDDVLRIVFGLSRNLSE<br>SSRKYRVIVKNLFLCLAVVCVAFALGASRMLAVIKGYSAPMKIYTHLSTLELQYGEGRSKALPQDVYNIC<br>VGKEWYRFPNSFFLPSSQFRLRFIKSEFSGLLPKEFAESGRGTQRTPPGMNMYNEEDPAQYFNDDLACHY<br>FVELDLEESVSGTTPNPIPPEARAAIWEEDFLWSEKSRPFRAFYPVPGWEHQYWTLAKYRIYRNAHLLPF<br>RRN |
| ALG12  | MRLYRALPFCWILAYVALAPCYQKVEESFNTQAVHDLLYHAWWRRDKIQHFHDHVAFPGIVPRTFIIPC<br>VIAALAFPFRLLL GATGKRLVHLVARLVVGAASAWSLDLIAGALEASHGVVIARAFVVVSCAQFHALYY<br>ASRTL PNTFALILTNAALAMRIRRRFEASWILLAVVVALLRSEVLLLICCLVVDLWPLKNHSLESLVRIA<br>LKL FSSALVTAFSSVAVDSYFWQRLSYPELEV FYFNAVLNKSSDWGVSPFHWHYFTSALPRALAGAFPLAA<br>FGLVQDPSCRRTCVPFVMFVALYSFLPHKELRFIFYAIPACNVCAATTVATVWTGRSSSKQSRLAWIMLL<br>GILLVSAALLPLYASASYWNYPGGRALDGLIHGSAECEGNSTRGPLRVHIDAKSATTGINRFLERDDGKW<br>LYSKEEDHSILTWVSDFELLVTERPTVDGFMIIHEEPFRRLRFPKALSWAELSAVVAVEPAIFVQCNTAL<br>HATCENLQACFDVKTSGRASRTISGEAKEL                                                                                                               |
| ALG6   | MEDETSARTNTEAELARAVTRVALDGSASAMPVGP RR GALAVITLAAVLWRSVLAMYPYSGEGLPPMY<br>GDFEAQRHWMELTVNLP RMWYVESELNDLKYWGLDYPLSAYMARLFASFAPPESVALVTSRGFESE<br>VFRAWMRNSVIVADLLVWFPAVALFVSTYXXRTAAERDETALFAVLVAMPCLVLIDHAHFQYNAVGLG<br>LFVLSVALLLRDSLVPDALGCFACLALNFKQMNLYALAVAFYLLGKASQRLRASGLAHAFTYLLILA<br>GAVFVTFASVWWPWLGAWDDVRAVLLRVFPLHRGVYEDKVANAWCSLGLFYRPLRRVTPWAACLCAT<br>LLASAPFCLSVLTKPGRRTFVLACAGVLSFFLFSYQVHEKHVLLPLTAVTMLCSDAPWLSVWMNAVAM<br>LSVFPLLDREGSSLAYVGSQLLNVCVHLFFFGRIDDSMPPSKSTSSSSSSSAAAAGHRWRAVAVTCHIVA<br>CHAAVELVRRPLCLIKRWPDLPTYVVTSSFLHLCAMYVLLRLLPRLPHAQHRYSSSAGTAEYSITEPQ<br>PLKLG                                                                                |
| ALG8   | MDGARELLPLAAREEEEEYHESRTLVELAKGTTKPVYIMARVTLLDPTLASLLTLSVALRVLLHARYAS<br>TDLNVHRDWMALTWNVHVRDWTAEISQWTLDYPLFAYLEYALAGVAHV LQVPGFELEDAGTQVN<br>ASATVFLRSTVLVLEILFLFSGMYVLVGSLYHDRGADAATAPSVTQSSAATMALSGLWLSPGILMVDYM<br>HFQYNSIALGLLLWTCVLLGNERKRLALDVGVALFVTALNTKHTLLYVAPCIGAAVLGVSNAGEDLKS<br>AWSLLQRCLTLLRLGVVGTVCMLAIWSPFIYHGQIAHVLMRMFPFQRGLLHSYWAPNLWALYAGTDKL<br>LAFVMGSEREKAWSTRGLVGMHPFAVLPSVGPRACALSLSLAAMIPAILLMLRLGNLRKSCFHGKTRLGI<br>VLFSTAYCALCSFVFGYHVHEKAILLCVIPLAPLSTLAPEYMRIFRILACAGYYGLLPLLFTPAEQVPKCAF<br>FVLHVSYLHRVSQKMQVNESAGEWLYMRGFVLELYCQFVHTWWFGHDRMHFLPLMLVSMYAACGV<br>LVAWAMGLGRLFALHCELMAQNGPKSAKSE                                                      |

**Table S2. Cont.**

| Enzyme | <i>Porphyridium</i> sequence                                                                                                                                                                                                                                                                                                                                                                                                                                                                                                                                                                                                                                                                                                                                 |
|--------|--------------------------------------------------------------------------------------------------------------------------------------------------------------------------------------------------------------------------------------------------------------------------------------------------------------------------------------------------------------------------------------------------------------------------------------------------------------------------------------------------------------------------------------------------------------------------------------------------------------------------------------------------------------------------------------------------------------------------------------------------------------|
| ALG10  | MPQPALVAAGAMLLVCLCLISALQPKPYMDELHVAQTQAYCRALASSSPSNMLDAIKSTPYDPAISTPP<br>TPYLLVSVVRYIVLAPFPRLVPVLCVSPALRIASACIAFCALLQVHAILKNVLIKATATRQELLHHYL RIGM<br>SQADWLSALALWLHPISSFFYMMFYTDNLAMLFLLLCMRQSHVFREPTLGKPV RVEYVAALMGV LASS<br>VRQSYMIWHALVVACSVVALAEEMHPKIGRKT LQVERMWAHRATITWILWPHVLAGLLYAGFVAFNG<br>GVAIGHREFHQPPHWMWFYFCAYRLIFYPDACRAEDVTVAGFSRAYLFSALEGTNARNRARMVVL<br>ANLVLAGLVIVSIWLGTVHPFVLADNRHYSFALFRRVLTPSARFLFLPTYMLGFVWLVADLGPFCIATLP<br>LLALGLVPVPLFEPRYFAPPFMISQFLTLLTQSRAARQKWYCGWFSSGIALSQIAAMLALFFFVPSRPPDA<br>HLPQDASLGRWMP                                                                                                                                                                                                              |
| ALG5   | MLIGWVAAGKVSRLRISRESVRTAQYLCWRRLRTGQIRATPCLQVRRRCRYLGTSADRRPKLLGQAEGE<br>GNMSSNIPMSEYTYIDPASM RPGRKEMFPSLFSSPAEVR LTVVVPAYNEEARLPAMMDEALAFLEKWGE<br>EDNSFTYEIIVANDGSRDKTALVALEYTKRFS AQKVRVLSLAQNAGKGA AVKKGIMAARGAVILFC DAD<br>GATRFADLSILYRQLELIARDQQADSL ENAHACVIGSR YHLKSSAERSLVREFVSRVFNLYVQYVGGV RG<br>VRDTQC GFKLFRRSAQLIFPCMHLD RWA FDFVEALYIAQAHCVAISEVPVQWMEIPGSKLSVVKASLNM<br>ARDMALMRWNYLTGVWSAGV PDLAHVGTQSNKFP                                                                                                                                                                                                                                                                                                                                 |
| DPM1   | DGLLVLS DTRMAGSDGPRGRDLYSVLLPTYNERENLPYIVWLLVRAFRSAGERCEILIVDDNSPDGTQEV<br>ARRLQRYYNRHDADESDGLQDDVRIELLTRAGK LGLGSA YMHASKQARGNFV LILDADMSHHPK YIPR<br>MIATQRTADYDIVTGC RYVPPHLLGGGVHGWDLRRKLVSRGANFLAQ LLLRPGVRDLTGSFRLYKRSAFE<br>RIMQHMRSSGYVFQMEIIVRARRLNC SIAELPITFVDRLFGT SKLGSLEIVEYLQGLWMLLTS                                                                                                                                                                                                                                                                                                                                                                                                                                                         |
| RTF1   | MGHDETGEGQDAALGLQGEHRHVAFVGAAMRGLSVIVLLQFVARVLSFLLKVV CARALGPARFAFGE<br>VKLQLLVALALLPAREGFRKVALRARS DAHAAMLSW TAAAASCLIAVLA WRLFERFGLSHDL DAPDRY<br>VHSLALMVA AWA AAIIEGVAEPSV VACARYQLYTAQAVSKSAALIAASCVT VVG VYRLPEVYLV LASAF<br>GLLCYALLFLLFFAVWRHEQAQAATAPRFVFCSPFR TFSATPSGRDDGVII VQQLYQALVRFALGDGE<br>NFVLLVTCSEQE QGAFKLASNIASLIARF LLEPLEELCFNVFSRLGNDLASFPQPTPGGSVTRV GSKTRDNS<br>SAFHTLETTLRVALTVVVLTTGMVACIGPSFATL FVHLMYGSTWAEHTRAPMLLSMYFSYVMVMSVNG<br>VVEALLNATATQKQORSYAAFTTLV SVGYLAAAWSSSHV LVGAAGLIMSNAVNMVLRIMFCARYAL<br>HFVHMPLGWLGVIFPRARSGAGLALCGALTFSARRWLLPAVDTAKSGVALLLSPAVCAHFL LGVCSTAG<br>GLGWIYTCERETISLGLGLYRGRGRGDETSKHL                                                                                                     |
| STT3a  | VDDGTYAFWNWFDASSWYPLGRIVGGTVYPGIMYTAALLH RAYRVIGIDLDIREVCVTLAPVFSGITALA<br>TYMLTQQTWNEAAGLLAAAFVGVIPGYIARSAAGSYDNEAVAITALILTFALFVKAVNTGSIAWAALAS<br>LSYLYMVSSWGGYIFVMNVIPIYVLTLLLMGRYTNRLYVSFCAFYVLGTLLSMQIRFVGFNAVQSSEHM<br>GALGVFGILNLYCCAMWIQSFSSPQTFRAVLRLLL MGALSLAGIAAVYGIYSGYIGPWTGRFYTL LDPTY<br>AKRKIPIIASVAEHQPTSWSAFFENHFLVMLMPVGIYHVL RNPNDTNVLLV VYGVFSTYFTGVMNRLML<br>VYTPMCCVLA AIAISELLSVWMVPLKQKGVIPSVRSLFRSDVSSEEAASTSAAGSTSRKTAKRMSKR DAS<br>SSTAVQQHGTAPVTDQVEVSLGLILV VFGMGIAFVHHCVWSSSEMHS SPVLSYKVRSGDRVFIDDFRE<br>AYQWLNQNTASSTRVLSWWDYGYQLAGMSNVTTIVDNNTWNNTHIGTVGRCLNSDEVVAHRIARKLD<br>VDYLVVFGGLIGYASDDLNKLIWPIRISGSVDPSVNERDYLTANGEYSIGDDASETLTNSLMFRLSYHRF<br>ADV VAPSVEPIRDQNRGTVSKKARDIRLHSFEEVFTTGHWL VRIYRVKPPHARGFLLAPVAET |

**Table S2. Cont.**

| Enzyme | Porphyridium sequence                                                                                                                                                                                                                                                                                                                                                                                                                                                                                                                                                                                                                                                                                                                                                                                     |
|--------|-----------------------------------------------------------------------------------------------------------------------------------------------------------------------------------------------------------------------------------------------------------------------------------------------------------------------------------------------------------------------------------------------------------------------------------------------------------------------------------------------------------------------------------------------------------------------------------------------------------------------------------------------------------------------------------------------------------------------------------------------------------------------------------------------------------|
| STT3b  | MAREGLAIRQSEALVRLGTMALIYVMAFSARLFSVIRYESIIHEFDPPWFNYRSTKVFVEDGMYAFWNWF<br>DHKSWYPLGRVVGTVYPGIMFTAGFIYHALHALGFPEIHVREVCVLTAPIFSGLTAAAYLLGTEAYSSG<br>AGLFAAVITSIVPGYMSRSTAGSFDNEGVAITALVFVFGFMRAVRTGSILYSALSAIAYLYMVSTWGGYI<br>FVINIPIYVMVMLVLGRFSNRLYVAYSTFYVLGTLTLLSMQIRFVGFQAIQSKEKLAALAVFGFLHLYVFR<br>WLYSLMPRRKFLLFSGTVAVLVGTVAIALSWAFRTNFFGPWEGRFYITLDPTYAQRFIPIASVSEHQPT<br>AWASYFMDLHVLNLFVGLYLLMKGVTDNLLLVYAVFAAYFSGVMSRLMLVLAPASALMSGVALS<br>EMTNKAAASVFEMVKRAPHDGSSTSTATLHPDGGTASSTDTAAQSGKRGAACKAVATRKAASVQGS<br>STASSSGKTGAAMSRPFKVTLEVSVALLLIASFVLFKYIQHCLYMANHYSSPSVVIQLNDGSYWDFFRE<br>AYFWLSQNTDPDDTVLSWWDYGYQLSGMANRTTIVDNNTWNNSHIATVGRCLNSDEKKAHTIARKLD<br>VDYVLIIFGGLVGYSSDDINKFLWPIRISGSVDPSVKEEDYLTARGEYSMGEDASETLKNSLMYRLSYR<br>NEVRNHGNFAVDLVRVQAPEHDITLRYFEEAFTSEHWLVRIYRVKQPDALGFT |
| OST1   | MWECISTFPARSVITNRLLPFFCAFLISLRDLFCIFLFLARFGHFQKLDKMVLTMMVQCTVQNQFPDQSI<br>AAYRVAIHPSDAEALHFLQACEHTDCFTDADGQRRLLSKTVEEGRDHGAQLYSFALTEPLMPGEERTLII<br>KYGFGQALKPVESNVQTSKQVLKFDVSSEFFSPYVTLQDALELKTASGWTIDAVRSDSNDVKKISTGIVS<br>RNVLAGVQPYTYTPVRVLVSGNSPLLKLDSEFRKIFTVSHWGNVNVREEYDLRNFGTALRGQNSRVDYDR<br>GQHFNVPKLRFLRPPDASNYYRDWDGNVTSSTLHKPGVRTRIFDATTRFPLFGGWKNAFWISYDLPAS<br>SLLSQSVGESTRFQLVGIVAPTIDASSILIDDLVAVSLPEGSHTHDAFVNGLDVETIDFGRNPATLAFKGR<br>PVLELHMGTVLTGLSVAPSVVVEYRFSPLSLLGPFMIISFILLGFVAWILLGYMSDVLITPADAVRMTHP<br>VYAKEKGQFAALCEGVMRVSAALHTLAAGISIPDQLQFFEEKSHALVLEL GALRS AVKSLEADV ASPVFF<br>THVSNLVDL<br>YNEWIPLKEQQRREPMAGDRLRELDGCLELELADLKFALGSI                                                                                                                                 |
| OST2   | MASSSVSSGSGSGPKSVWGLKSGYEAGVPLYL<br>KVIDAYILAVFMTGIVQFAYCMVVGTFPFNAFLAGFISTVGTFLVTVSLRMQVNPQNLADPANSWQSLTL<br>GRVVADWLFANLVLHMTVLNFIG                                                                                                                                                                                                                                                                                                                                                                                                                                                                                                                                                                                                                                                                     |
| OST4   | MITDEQLVSVATWGGYLVI GLVILYHFVVASASALPPSASASSASTKKDL                                                                                                                                                                                                                                                                                                                                                                                                                                                                                                                                                                                                                                                                                                                                                       |
| WBP1   | MRLQNTWCGPMAGSFWYRLQPRGSTRVWLTMLGMIFMLLIVMGGAGVVAIGPDGRDRVVVIVPTLSD<br>MQEKYKTIQEHLVETGYAVTVKALDAPDTAEILLMQDGEYVFDTAVSLVPRAQNLGPGWSAGAVLDFV<br>DQGGSVFVAADYNYGAFTKQLAAGLGVQLDDKLNVIDHGSFDAGLDQDGSFSFIKAGGVTKAKPIVN<br>AGSPSASSILFKGVGASLYTSNELVEPVLWGSPSAYCGRKFESATDIPLASGNEVVLGAVLQARNTGTGR<br>GAYIGGVAMLQDQVMQLAGVKHRDFYLDLLSWTCGERGVLKAENVRHWLANNGEQRGTYKVQDDIG<br>FALDVFEWAGALGHWIPTTPEDMQVEFTMLNPNYIRARLVPLVSESSGESASMHANLTIPDVIGIYKFEIAY<br>VRTGYSHVALMENVNVRPFWHNEYERFIQAYPPYASAFVMMGSLIVFTAVVLYGKPTVDAERQHKAK<br>DAR                                                                                                                                                                                                                                                                              |

**Table S2. Cont.**

| Enzyme | Porphyridium sequence                                                                                                                                                                                                                                                                                                                                                                                                                                                                                                                                                                                                                                                                                                                                                                                                                                                                                                                                                                                                                                                                                                                                                                                                                                                                                                                                                                                                                                                                                                                                                                                                |
|--------|----------------------------------------------------------------------------------------------------------------------------------------------------------------------------------------------------------------------------------------------------------------------------------------------------------------------------------------------------------------------------------------------------------------------------------------------------------------------------------------------------------------------------------------------------------------------------------------------------------------------------------------------------------------------------------------------------------------------------------------------------------------------------------------------------------------------------------------------------------------------------------------------------------------------------------------------------------------------------------------------------------------------------------------------------------------------------------------------------------------------------------------------------------------------------------------------------------------------------------------------------------------------------------------------------------------------------------------------------------------------------------------------------------------------------------------------------------------------------------------------------------------------------------------------------------------------------------------------------------------------|
| GCS1   | <p>MDTDTAVYTRSTAVCINASSRRASRHTASPTASLLTTYAIISRECSACSSCASGAPPRAPSASILLPLLFPFR<br/>                     KLVDQQRSSRQALGRDVSTRLLRACRMGMARRACA VRVIALLA VLVGARSCVLADTPPNHRRWGLWR<br/>                     PRLIAGVRSNVRDSAMFGIGWQGE GAVRSALRMCADDGSNGVQFGYVRHDGRAYAQQVIVDAQLQVK<br/>                     MNMDWILVEHKTRDHLPAFAWVLRITGEHIETE QDSRSASGASYVSLFLTAASGADEDDIEGQEEEPHV<br/>                     SEIECTGHSSDVCIQGQSGRSVSALTPYKLMYKQPTYGTPATLSFAARPPKLAYPEHIVSTWDASISALLV<br/>                     AKDASKHSGPRRDLSQPVTVLGAWAREQQFASEQHVLRYMKDDGSGVRTLHADDPEAVDSCADART<br/>                     CSVAVVQRVLERDFRVEIVFSEFAFDELLE VSLCGAALDERIERARRAFDDRHALFRGIAQNYKAGSTET<br/>                     RMATYALSNNLGGFGFFHGSSWVERENTEIATSTDAGIEPKNKLETREVAQVLGQDGKLAALTPQNLFTA<br/>                     TPRS VVFPGRFLWDEGFHQLVVLQWDTQLALESLMSWLG VIRSSGWIPREQVLGFEEARAAFPKHISHLMI<br/>                     QNPSVANPPTMLMPWQVLARRCHNMHQGTKENSLDRVHPEQDATCSAATWEHVANALGLHLRWLDT<br/>                     NQRTRDASAYQWKGRNERHRPQNGRNPFTWASGLDDYPRARVPSAQEKHLDLHTWMVWAHAAMVTI<br/>                     TSLAGHSESSVDALKRRADELKSMMETQFGGSDRHGLLFDLDRDGAQIEHVGYVSLFPLMLGLVPHDS<br/>                     PRVGAALAAMQDPEQLWSVAGIRSLSKSDDYLLKGDQYWTGPVWIPINYL LLAGLHNKYAAYPGPYRE<br/>                     RARALYDDLRRITVTN MARNFEQQSTLFENYNDRTGDGQKGRFLTGWSSLIVLIMAEYEYGLIV</p>                                                                                                                                                                                                                                                       |
| GANAB  | <p>MRNAARGRALAARALLWVAGVLALAILAFNPLRECEGATWNKLTCAQSGFCSRHRGLPPRPHNQVTY<br/>                     AVRPESVHV GSSPNDDGAVSGLVSISTVDSGSEAESMSVDLAFQIRAYDNGVMRWTLDEQPGNGRFERY<br/>                     RPTDGVLVDSLRAVRITEDTDLDRSSPLRLRVCSACKAGLTDPPVLVIDYNPLRVTLDESARGAPLVILNG<br/>                     HELLRFERQDEDIIEPPESQQHEEAPTHQANSEHSPEVGGDHEGASHVADGTDHSDEY MAGYYDDVAGN<br/>                     ENDFGLDAYTAPYEDYNHGLDDMHA VPYGEDA VPDDIALREFEAPVAPHGSETAHACRGC FQETFDGH<br/>                     TDVKARGPESIGVDIEFPRA SHVFGIPERTSSFALQDTKRDGLAQSGESLSDPYRMYNLDVFEYELNSPFG<br/>                     LYGSVPLLTAVTDGGHWSGVFWLNPSETYVDVTGANGTASGGHNGSNTSITTHWFSESGVMDVFLGG<br/>                     GDMPCIVYNQYVSLTGPAAVPNTFALGFHQSRWKADFEADTRA VDRSFDTHDVPYDVLWLDIEHTDGK<br/>                     RYFTWDLNKYPNPVQLQHDIDARGRKMVTIIDPHVKRDGN YALHRFAEENGLYVKEADGTTDYVGFVCW<br/>                     PGSSSYDFVNP AVRAAWASRFSPEFYKELTPSLYTWVDMNEPSVFN GPEQTMPKGLKHFGGWEHRDV<br/>                     HNLYGLFVQRATFEGLLQARNSTDRPFVLSRAFFAGSQRFGA VWTGDNAASWGHLQASIPMLLSLQISGI<br/>                     VFSGADIGGFFGNPTRPLAVRWYQAAAFQPFRAHKHIDADPREPWLLGNDNMQHIRKAISERYTFLPY<br/>                     WYTLFAVASTVLDASDARAASKDGMHHPMPRIWWHFP SERALLGGKEQEHSWMVGDALLVAPVLSE<br/>                     NTEAHRVRLPGGGGGDVSKNAPKSANSNSGATASRWF DLYGDYAE LSGGETHIYNEVSLDRMFV FQRG<br/>                     GTIVPRKMRRRRSTVAMNLDPLTLVVALDSFETAHG TLYVDDGKSFA YEEGNFVRSFEFSSNRLTARTV<br/>                     AGSEEWLDDQRTERSRILCEKILVLGLAVEPSTILAE TIHRNADGSYVPKTVELERDINFNFYAQSRKLVV<br/>                     RRLPFRAYSGDWTLHLM</p> |
| GANABb | <p>MARELLGLRSACHDSRVLLAAAKDMRALQLSLSAVVA VVLAHALSRVHGDPGVRVRGAGAQR LQQY<br/>                     PHGQPFSCVPLDAPPGRTRAVQLPYALVNDDHDCADGSD EPGTSACSGAGGYFVCDADVGAPSIHASFV<br/>                     DDGVCDCDGSDEYAGRTHCQNVCD AQWERAIQESERKVGAFQRALAKRKRMEKDGWTL LAKDRDEI<br/>                     NASAALDTEGSLKKVGEYDAHIEELGRLVKRWEDGLARNPTS DINLTVSESAGQSTSAEADSELTTESDT<br/>                     VQGAETMDVLSKWPPSRCAD FISA WPSEKEEKLGRGLPHQLVDSFVSATERLCKIMPFTSCVHQDAERES<br/>                     FHALSIDARLLAAKSCVD AIQKERKLLLDK VQDRQSQA AERIRTL DANHARFP GVRVLRDNCYRSP LGA<br/>                     YEYEICPLVKVLQYEHGRQIAKLGDFKSLMSI ESSVRMDFRLGDYCWGRSRRSITVDLACDESEAIVEVSE<br/>                     PSQCKYHMFVSTAAVCE DGM LDV ASRQLD TLRSTRHGSQVPASDPRDEL</p>                                                                                                                                                                                                                                                                                                                                                                                                                                                                                                                                                                                                                                                                                                                                                                                                                                                   |

**Table S2. Cont.**

| Enzyme | <i>Porphyridium</i> sequence                                                                                                                                                                                                                                                                                                                                                                                                                                                                                                                                                                                                                        |
|--------|-----------------------------------------------------------------------------------------------------------------------------------------------------------------------------------------------------------------------------------------------------------------------------------------------------------------------------------------------------------------------------------------------------------------------------------------------------------------------------------------------------------------------------------------------------------------------------------------------------------------------------------------------------|
| MAN1a  | MQDASLEHQQCVAIDFVYSMLSEEAKARFAIERFGLDPFRRVGSYAAYKQQLRNARGCSSTLVSPSSS<br>MHASACAGVPTKAPAPYVFEHDDIQAKADAIRNATRGAFLAYTFYAFGSDELAPLSRGGVNNFGGMG<br>VTIIDLSTLYMMDLMEEYALARAWVENQLSFERVGEVVVFETIIRVVGGLASTFQLTGDELFLRKADEL<br>GKLLGFAFHSPSGVPPFLCHLGRRCYAKTSHNEMIPAEAGSIQLEFRALSAMSSDPFIQIRFSADDFRL<br>VDSYFEAGEVVRVDGNVSMGSLPSPKINFRTGRFKSSMHMLGAPSDSYEYLFKLWVQSGYTERHLFEKF<br>RNVVRDTIRYLLRRSPALGLYYVFELSGGQPITKMDHFSCFFPATLASACSLPFAPLSNAERAEMELAE<br>MLAETCHEMYSRSPSGLAPEHVLFDTGKRDWVMFGSYEQRPEAIEAFLFLWRTRNPKYRDWAWSIFER<br>IQQHSRTAEGAYATLSKARSRRPPKADRMHSFLISETFKYL YLMFQPDHVLPMHLFVLNTEAHPLLLQPH<br>GLLPQAQDASKDGGTSAGSLP                         |
| * UGGT | VSDAPRTWLVSASAAHVLDLNVVLAPQVDKDVKKRRTILAEYVLDVAVIISGSAWENAYAPGQDEQEG<br>KGAVAQSVQGLQLALKRFGGQLVSDTVVMQNVGYYQLRATQPSRLR VEMIGAGRDFVFEATGEPYV<br>GVMLDSXXXXXXXXXXXXXXXXXXXXXXXXXXXXXXXXXXXXXXXXXXXXXXXXXXXXXXXXXXXXXXXXXXXX<br>XXXXXXXXXXXXXXXXXSAGRAWQRHVPVHFLTAKSKEPIHVFSVASGHL YERFLRIMMLSASRQSSRPIK<br>FWLLGNYSMPFKAALPAFAAEHGFDYELVAYQWPPWLRQSQRVWLWAYKILFLDVLFPDLDVSHVIF<br>IDSDQVVRGDLAELLSYQPLPHGAPYAFVPCDSRVDVEGFRFWKHGYWRGVLGERPYHISALFLVDLR<br>RFRRIAAGDALRVQYQLLSRDPASLSNLDQDLPSMNKPGGLPIASLPLDWLWCETWCAEDTKWRARTI<br>DLCNNPMTKEPKLVSAKRIIPEWQLDKEATKSMARILAVNASVSCNVGEKNSAEPP                                                            |
| CALNEX | MDDEELARLMEAYGGGGFGGMGENYEDEDPYGGLGAGGFGDMPPPGLLEDDLVIDSGVDSEAYSPDPA<br>PASALFLETQRNAFDEDRWVYSSKAQYNGRFVLGGGRAPGIHGDKGAMLSEKARFYGAVAMLPEPVV<br>VAHGDKLVFQYEVKFDSTCSGAYMKLPKSPFATPDVFDNSVQYSIMFGPKCGDTAKVHVIIQSEHPT<br>TGKLTEHHLTNPPAPFIFGSETHLYTLVLDVAAQTYEVRVDGDVKKAGSLAHDFFPPFPSTIPDAKDTK<br>PADWEDEPRIPDPSATKPADWEDAPLFIPEDESATKPDDWLEDEEPQIPDPSAVKPDEWEDSEDGAWQAP<br>LIENPKCVDNCGPWVAPQIANPDYKKGWTPMIDNPKYVGPWAPREIENPDYKVEQVTLPIAALAF<br>EIWAMDYGIIFDNVYLGTSVEDAEAFANATTVVKRAAETKKEHTAKK DASDGN SKIKNQVLDAADAV<br>ANALEVVLSPIDALLRKHGLDVYVDAALDFVGSHP LIPSVGIPLV LVVFFLV LTAHRKKQTRSSRTTAVPD<br>VXICEEDGRAASGRCCGACTVSGAIRDHTRAEAGSGGXRRRKA EH |
| CALRET | MSRARVWQCVLRIAAVASACGFCAAGRWDLSKKPENGAVPFYTMPVVEPPAHAYLWEDFQYKTSFF<br>QVKPGDTEATSWMYARGRGADGAPEIGSIDPLWYRVDKGIGFRKRQRQHYKVARKLDIDTIPDGFTIQF<br>DVRCKAFWTCGLFWKLLAAPLNSVQDFKDTSPSSIVFGPDRCNEKSRVLVIITTKNPVSGEYEEHVLQN<br>APEPHNHVYKATNL YRLSLFFERGEAVVAVNDKEYVYSLDNDFFPPFPQRKMVDDPADSKPSDWVDER<br>EVVDLDDRQPDDWDETQEPWIPDTSVQKPDDWLEENAFMKDPNVRKPDFWDDEEDGPWQESWITNP<br>LCLTGKCGTWHQPQIPNPNFRGKWKPR TIPNPDFKGEWQPRKIPNPTYEIDSVSQSIMLPVAGVALDVLV<br>SDYNIWFDNLVYGRSDSEAKYLAEEETSKKKQFYETYFEAYPPTVDSEGIPLKEKPWQEMRTHDSQKGAA<br>ETA AKDEL                                                                                                               |

\* Due to missing information in our genomic data, we have only partial data for the UGGT; the line of X's represent this missing information.
